# Supplementary material for: Long-chain saturated fatty acid species are not toxic to human pancreatic β-cells and may offer protection against pro-inflammatory cytokine induced β-cell death
Source: PubMed Central journal article supplement (PMC7802137; doi:10.1186/s12986-021-00541-8), 2021-01-12
Supplement: 12986_2021_541_MOESM1_ESM.pdf [file 12986_2021_541_MOESM1_ESM.pdf]

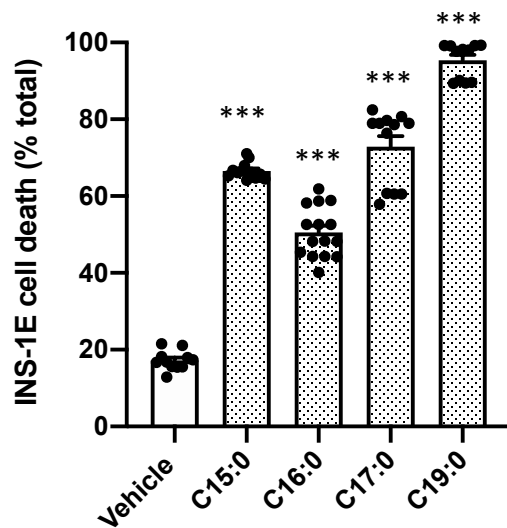

**Supplementary Figure 1: The effect of LC-SFA, increasing in carbon chain length, on rodent  $\beta$ -cell viability.** INS-1E cells were treated with vehicle [ $0 \mu\text{M}$ ] or  $250\mu\text{M}$  of C15:0, C16:0, C17:0 or C19:0 for 24h. Cell death was assessed using flow cytometry after staining with propidium iodide. Dots represent individual data points from a minimum of three independent experiments and the histograms represent mean values + SEM. \*\*\* $p < 0.001$  relative to vehicle [ $0 \mu\text{M}$ ].
