# Supplementary material for: Long-chain saturated fatty acid species are not toxic to human pancreatic β-cells and may offer protection against pro-inflammatory cytokine induced β-cell death
Source: Nutr Metab (Lond). 2021 Jan 12;18:9. doi: 10.1186/s12986-021-00541-8 (PMC7802137; doi:10.1186/s12986-021-00541-8)
Supplement: Supplementary file 2 — Additional file 2: Raw datasets. Raw data (Figures 1–4, sup. fig.1) on which the conclusions of the manuscript rely. [file 12986_2021_541_MOESM2_ESM.xlsx]

## Sheet: Figure 1
Fig.1A
Concentration C16:0	INS-1E cell death (% total)
0	26.62	28.2	26.37	21.94	25.58	26.48	24.67	23.37	21.24	23.44	23.33	22.29	17.5	21.02	25.02	10.07	25.65	12.32
125	35.88	33.34	32.34	34.32	38.96	37.24	45.52	47.06	40.8	43.32
250	65.22	68.3	51.18	52.48	48.2	54.04	63.28	65.68	54.1	63.28	55.46	52.87	41.24
500	86.94	88.42	80.02	78.34	76.4	76.2	82.54	83.5	82.9	84.18	71.4	70.37	86.8	69.17	78.99
Fig.1B
Concentration C16:0	EndoC-βH1 cell death (% total)
0	24.9	34.8	17.53	17.28	20.52	20.96	21.78	23.24	25.88	30.66	33.68	27.36	32.72	20.44	22.62
125	19.2	18.72	18.16	16.76	30.24	29.78	26.4	24.3	13.54	15.14	13.56	13.68
250	22.8	22.2	19.22	17.9	24.17	23.45	32.57	25.53	25.42	18.74	17.82	21.26	33	29.78	25.3	31.62	14.46	14.68	15.72	17.06
500	25.1	16.95	18.11	22.31	18.77	29.71	33.22	17.06	18.7	16.26	16.06	32.66	27.36	26.88	26.6	13.8	11.98	13.44	12.52
Fig.1C
Condition	EndoC-βH1 cell death (% total)
5.5mM Glucose	28.7	32.1	19.1	19.1	19.9	20.5	19.7	19.7	20.72	19.9
5.5mM Glucose + C16:0	34.6	27.5	25.5	27.4	13.8	14.4	13.9	14.2	12.9	14.2	12.4	13.4	16.96	19.86
20mM Glucose	30.3	26.3	27.6	20.1	20.9	20.4	20	20.3	22.2	18.3
20mM Glucose + C16:0	24.7	35.1	29.8	39.2	15.9	15.1	16.4	16	13.5	12.14	12.16	12.5
Fig.1D
Concentration C16:0	EndoC-βH1 cell death (% total)
0	24.46	27.24	11.1	13.1	14.4	16.36
125	32.66	30.26	29.12	13.08	15.74	16.4	18.92
250	33.54	33.98	29.1	15.04	15.8	16.36	18.6	17.84
500	32.18	32.82	35.04	15.62	17.12	16.74	21.82	22.28

## Sheet: Figure 2
Figure 2A
Condition	INS-1E cell death (% total)
Vehicle	17.5	18.7	17.9	15.8	19.3	22.1	20.3	22.4	27.1	26.4	22.7	23.8
C15:0	87.8	86.4	90.1	88.2	87.6	84.1	84.7	85.2	88.1	89.9	90.3	80.6
C16:0	88.6	90.9	89.5	90.1	66.4	72.4	70.2	67.7	77.9	76.6	79.7	82.4
C17:0	63.9	60.6	66.5	59.6	67.1	65.4	69.2	66.2	85.1	85.3	87.4	86.4
C18:0	93.7	93.6	96.1	95.6	92	91.7	92.1	59.2	58.5	62.7	61.7
C19:0	99.2	99.2	99.1	99.3	99.5	99.5	99.5	99.4	99.3	99.2	97.8	98
Figure 2B
Condition	EndoC-βH1 cell death (% total)
Vehicle	29.9	29.3	19.3	18.4	19.2	23.2	28.74	32.09	21.78	23.24	25.88	30.66	33.68	27.36	32.72	20.44	22.62
C15:0	27.18	29.8	30.14	27.28	20.6	13.86	15.62	16.94	31.06	22.08	26.84	19.1
C16:0	23.9	26.9	23.1	24.5	15.7	13.46	16.86	16	34.56	27.5	25.46	27.44
C17:0	28.3	26.9	29	26.9	32.16	21.96	30.66	37.64
C18:0	28.2	29.6	26.94	26.1	14.8	14.86	15.52	13.46	26.48	29.72	23.1	28.46
C19:0	62.2	58.9	67.9	61.5	84.04	64.12	77.9	47.98	54.28	56.52
Figure 2C
Concentration C19:0	EndoC-βH1 cell death (% total)
0	21.78	23.24	25.88	30.66	33.68	27.36	32.72	20.44	22.62
125	22.26	27.72	22.56	21.84	35.9	35.36	24.22	31.1	19.04	14.12	16.88	15.38
250	34.66	36.54	30.62	36.4	31.68	32.28	41.8	17.82	20.48	17.7	23.3
500	49.94	56.32	53.52	52.96	54.26	55.74	50.32	52.82	42.26	42.92	47.12	52.24
Figure 2D
Concentration C19:0	INS-1E cell death (% total)
0	24.88	23.56	23.64	26.37	21.94	25.58	26.48	24.67	23.37	21.24	23.44
125	74.24	74.48	75.72	73.1	48.66	54.7	52.28	49.22	50.16	53.32	48.58	52.44
250	97.2	97.28	97.76	97.94	89.12	88.94	88.26	87.96	88.08	87.54	84.54	89.38
500	99.1	99.22	98.98	99.5	98.22	98.34	97.82	97.92	96.98	97.28

## Sheet: Figure 3
Figure 3A
Condition	INS-1E cell death (% total)
Vehicle	26.24	30.47	22.68	21.95	19.76	23.07	12.84	15.42	16.7	18.18
C16:0	41.46	37.54	43.01	43.48	42.87	41.55	44.2	45.3	48.3	40.1
C18:1	27.45	28.02	22.1	21.98	25.27	22.55
C16:0 + C18:1	21.01	25.78	19.95	17.76	19.4	21.11	8.6	7.7	8.9	11.5
Figure 3B
Condition	EndoC-βH1 cell death (% total)
Vehicle	20.72	19.9	25.5	25.58	20.72	19.9	29.9	29.3	26.6	28.44	30.7	25.84	23.58
C16:0	16.96	19.86	26.06	24.02	23.9	26.9	23.1	24.5	26.42	28.24	26.88	25.1
C18:1	22.2	28.1	26.68	31.82	31.28	32.24	31.66	32	29.7	30.94	29.18

## Sheet: Figure 4
Figure 4
Condition	EndoC-βH1 cell death (% total)
Vehicle	34.07	43.7	34.5	37.13	32.77	27.18	48.98	27.1	34.64	28.81	29.07
C16:0	15.2	17.63	21.5	22.23	32.6	35.32	35.78	25.68	38.08	22.52	19.26	20.02	18.75	21.1	21.88	20.55
C16:1	26.67	31.87	38.2	35.1	50.5	41.82	44.98	28.2	34.36	37.08	24.16	25.93	24.86	25.69	27.72	26.73
C18:1	26.43	49	60	58.57	34.08	33.6	30.46	46.6	50.56	47.68	30.46	30.82	32.57	32.56	32.66	34.48
Cyt	93.08	94.72	71.67	84.88	81.96	79.48	84.44	96.72	98.48	94.68	77.42	77.1	73.41	78.05	77.96	74.38
Cyt + C16:0	31.27	35.37	47.87	41.4	73.44	71.58	70	61.16	64.32	60.84	71.99	72.33	74.85	72.83	75.73	73.19
Cyt + C16:1	53.03	66.67	61.03	52.47	78.38	80.98	79.46	66.56	73.8	69.64	71.99	74.85	72.3	73.31	71.18	76.48
Cyt + C18:1	67.6	84.57	70.38	60.13	64.36	50.58	53.78	50.36	48.32	50.6	80.32	79.23	79.95	80.88	79.68	80.51

## Sheet: Supplementary fig.1
Sup. Fig.1
Condition	INS-1E cell death (% total)
Vehicle	12.84	15.42	16.7	18.18	15.5	17.34	16.8	15.66	21.54	21.16	17.94
C15:0	64.44	65.74	64.16	65.28	64.7	66.68	66.16	66.58	71.06	66.18	67.98	70
C16:0	44.18	45.34	48.26	40.12	52.6	44.28	48.22	52.6	44.28	48.22	52.6	58.24	58.84	61.86	58.74
C17:0	57.9	60.52	60.56	60.7	76.36	79.72	78.98	78.64	78.92	82.42	78.96	80.72
C19:0	89.62	90.12	89.38	89.46	99.26	99.18	99.1	99.2	98.02	97.74	98.2
